# Supplementary material for: A Qualitative Study Exploring Factors Associated with Retention in HIV Care among Women with HIV in a Large HIV Clinic in Lagos, Nigeria, after Implementing the Test and Treat Policy
Source: AIDS Res Treat. 2022 Aug 9;2022:9074844. doi: 10.1155/2022/9074844 (PMC9381265; doi:10.1155/2022/9074844)
Supplement: Supplementary Materials — The semistructured interview guide used to carry out the interviews with our study participants. Completed SRQR checklist. [file 9074844.f1.zip]

Archive with 2 entries (2 files):
- INTERVIEW GUIDE.docx
- Standards for Reporting Qualitative Research Checklist.docx
